# Supplementary material
Source: MDPI journal article supplement (https://www.mdpi.com/2311-5637/10/1/69)
Supplement: s1 [file s1]

# Enhancement of lycopene synthesis by *Brassica trispora* by low frequency alternating magnetic field

Hong Wang <sup>1,#</sup>, Jiayang Hou <sup>1,#</sup>, Dongxu Wang <sup>1</sup>, Maohua Yang <sup>2</sup>, Jinlong Liu <sup>1,\*</sup>

<sup>1</sup> College of Food and Biology, Hebei University of Science and Technology, Shijiazhuang 050018, China  
<sup>2</sup> CAS Key Laboratory of Green Process and Engineering, Institute of Process Engineering, Chinese Academy of Sciences, Beijing, 100190, China  
\* Correspondence: jlliu18@126.com  
# These authors contributed equally

Figure S1: Lycopene standard curve.

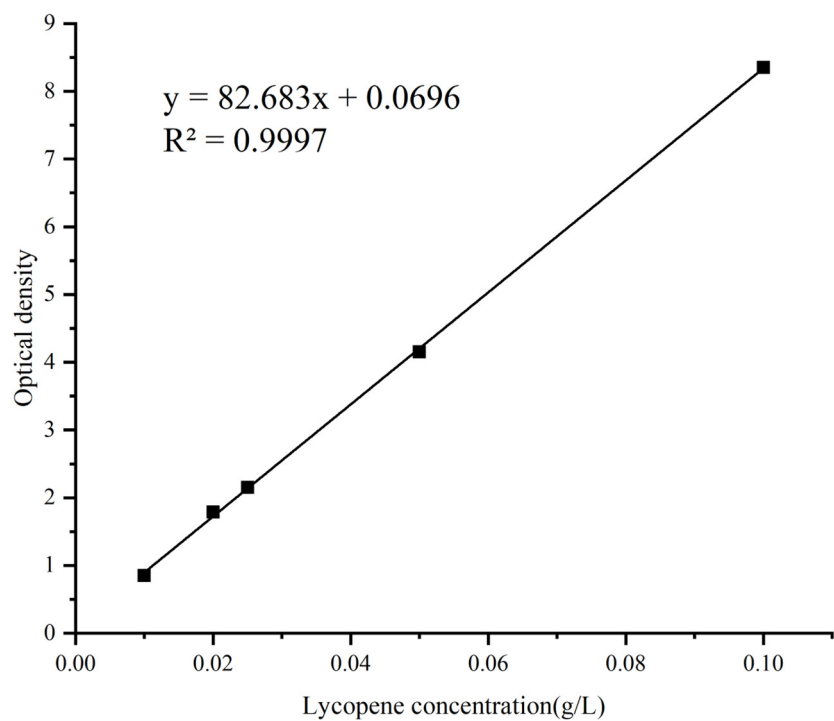

Table S1: effect of magnetic field intensity on lycopene yield.

| Magnetic field intensity(mT) | Lycopene production(mg/L) |      |
|------------------------------|---------------------------|------|
|                              | AVG                       | SD   |
| 0                            | 466.2 <sup>c</sup>        | 32.2 |
| 0.2                          | 597.2 <sup>c</sup>        | 33.7 |
| 0.5                          | 870.2 <sup>a</sup>        | 45.5 |
| 0.7                          | 658.2 <sup>b</sup>        | 24.8 |
| 1                            | 387.5 <sup>d</sup>        | 26.3 |

Note :The lowercase alphabet with different right shoulder in the same column showed significant difference ( $p<0.05$ ); AVG:average value;SD:Standard Deviation.

Table S2: fermentation curve of *Brassica trisporea* under the optimal magnetic field conditions.

| Time(h) | Biomass(g/L) |     |           |     | Lycopene production(mg/L) |      |           |       |
|---------|--------------|-----|-----------|-----|---------------------------|------|-----------|-------|
|         | Control      |     | Treatment |     | Control                   |      | Treatment |       |
|         | AVG          | SD  | AVG       | SD  | AVG                       | SD   | AVG       | SD    |
| 48      | 31.2         | 3.5 | 31.2      | 3.5 | 193.6                     | 33.5 | 193.6     | 33.5  |
| 72      | 48.5         | 2.8 | 43        | 2.5 | 283.3                     | 47.2 | 438.4**   | 51.5  |
| 96      | 59.6         | 4.5 | 54        | 4.7 | 367.8                     | 52.6 | 857.8**   | 69.7  |
| 120     | 68.2         | 2.4 | 66        | 2.3 | 453.2                     | 68.3 | 1421.2**  | 84.9  |
| 144     | 72.1         | 2.3 | 70        | 3.9 | 466.4                     | 72.6 | 1473.6**  | 99.2  |
| 168     | 72.5         | 3.9 | 70        | 3.2 | 467.8                     | 77.2 | 1477.8**  | 102.3 |

Note:\*\*means extremely significant ( $p< 0.01$ ) difference between the control group and the magnetic treatment group;AVG:average value;SD:Standard Deviation.

Table S3: The effect of magnetic fields on ROS-related enzyme activity in the lycopene synthesis pathway of *Brassica trisporea*.

| Time(h) | SOD activity(U/mg) |     |           |     | CAT activity(U/mg) |     |           |     |
|---------|--------------------|-----|-----------|-----|--------------------|-----|-----------|-----|
|         | Control            |     | Treatment |     | Control            |     | Treatment |     |
|         | AVG                | SD  | AVG       | SD  | AVG                | SD  | AVG       | SD  |
| 48      | 18.3               | 2.1 | 18.3      | 2.1 | 13.2               | 1.9 | 13.2      | 1.9 |
| 72      | 23.3               | 1.2 | 26.5      | 1.3 | 15.4               | 1.2 | 18.4      | 1.1 |
| 96      | 26.2               | 1.3 | 30.3      | 1.1 | 18.3               | 2.1 | 24.1      | 1.9 |
| 120     | 32.1               | 1.4 | 35.2      | 1.2 | 23.3               | 1.8 | 29.3      | 1.9 |
| 144     | 29.2               | 1.1 | 31.3      | 1.4 | 19.2               | 2.2 | 24.1      | 1.6 |

Note:AVG:average value;SD:Standard Deviation.

Table S4: The effect of magnetic fields on crucial enzymes activity in the lycopene synthesis pathway of *Brassica trisporea*.

| Time(h) | PDS activity(U/mg) |     |           |     |
|---------|--------------------|-----|-----------|-----|
|         | Control            |     | Treatment |     |
|         | AVG                | SD  | AVG       | SD  |
| 48      | 13.2               | 1.9 | 13.2      | 1.9 |
| 72      | 15.4               | 1.2 | 18.4      | 1.1 |
| 96      | 18.3               | 2.1 | 24.1      | 1.9 |
| 120     | 23.3               | 1.8 | 29.3      | 1.7 |
| 144     | 19.2               | 2.2 | 24.1      | 1.6 |

Note:AVG:average value;SD:Standard Deviation.

Table S5: The effect of magnetic fields on intracellular ROS in the lycopene synthesis pathway of *Brassica trispora*.

| Time(h) | ROS(FI/ $\mu$ g) |      |           |      |
|---------|------------------|------|-----------|------|
|         | Control          |      | Treatment |      |
|         | AVG              | SD   | AVG       | SD   |
| 48      | 2.1              | 0.12 | 2.1       | 0.12 |
| 72      | 3.8              | 0.15 | 2.5       | 0.13 |
| 96      | 4.4              | 0.23 | 3.1       | 0.24 |
| 120     | 4.9              | 0.25 | 3.6       | 0.26 |
| 144     | 5.2              | 0.28 | 4.4       | 0.29 |

Note:AVG:average value;SD:Standard Deviation.

Table S6: The effect of magnetic fields on cellular membrane permeability in the lycopene synthesis pathway of *Brassica trispora*.

| Time(h) | Relative conductivity(%) |     |           |     |
|---------|--------------------------|-----|-----------|-----|
|         | Control                  |     | Treatment |     |
|         | AVG                      | SD  | AVG       | SD  |
| 48      | 32.1                     | 1.4 | 32.1      | 1.4 |
| 72      | 43.3                     | 2.8 | 40.2      | 2.1 |
| 96      | 55.4                     | 3.4 | 48.8      | 2.3 |
| 120     | 69.3                     | 2.6 | 57.2      | 3.7 |
| 144     | 80.1                     | 3.7 | 66.7      | 4.5 |

Note:AVG:average value;SD:Standard Deviation.
